# Supplementary material for: Consumption of Dental Treatment in Patients with Inflammatory Bowel Disease, a Register Study
Source: PubMed Central journal article supplement (PMC4534207; doi:10.1371/journal.pone.0134001), 2015-08-12
Supplement: pone.0134001.s001.pdf [file pone.0134001.s001.pdf]

# Supporting information

**1B**

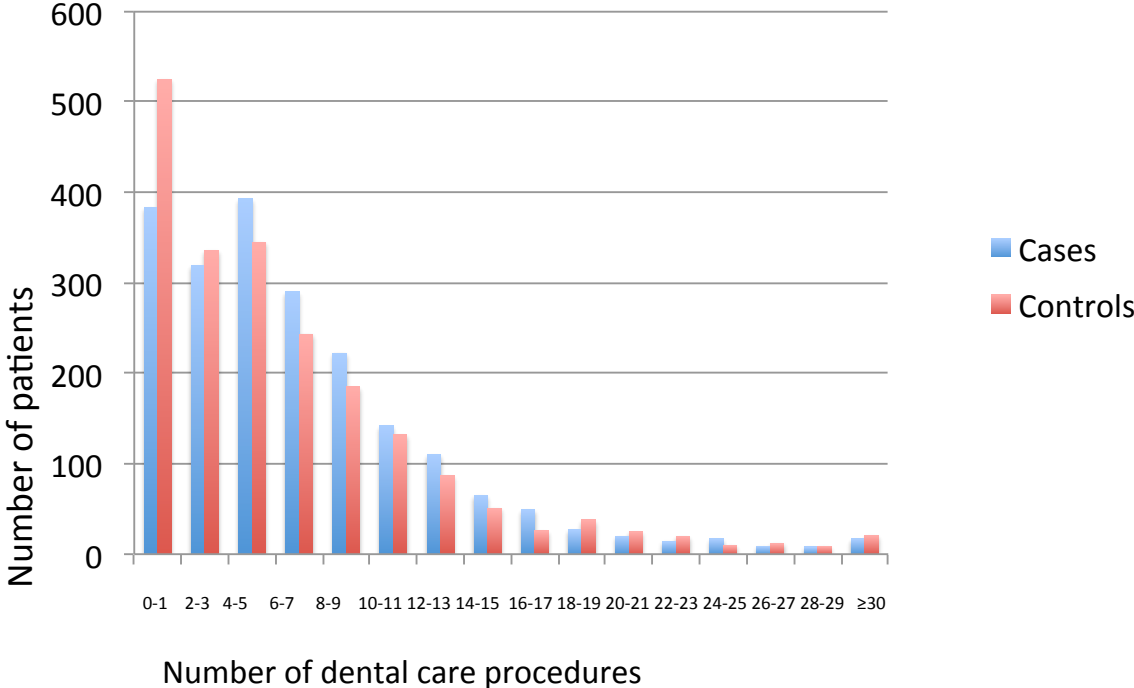

**1A**

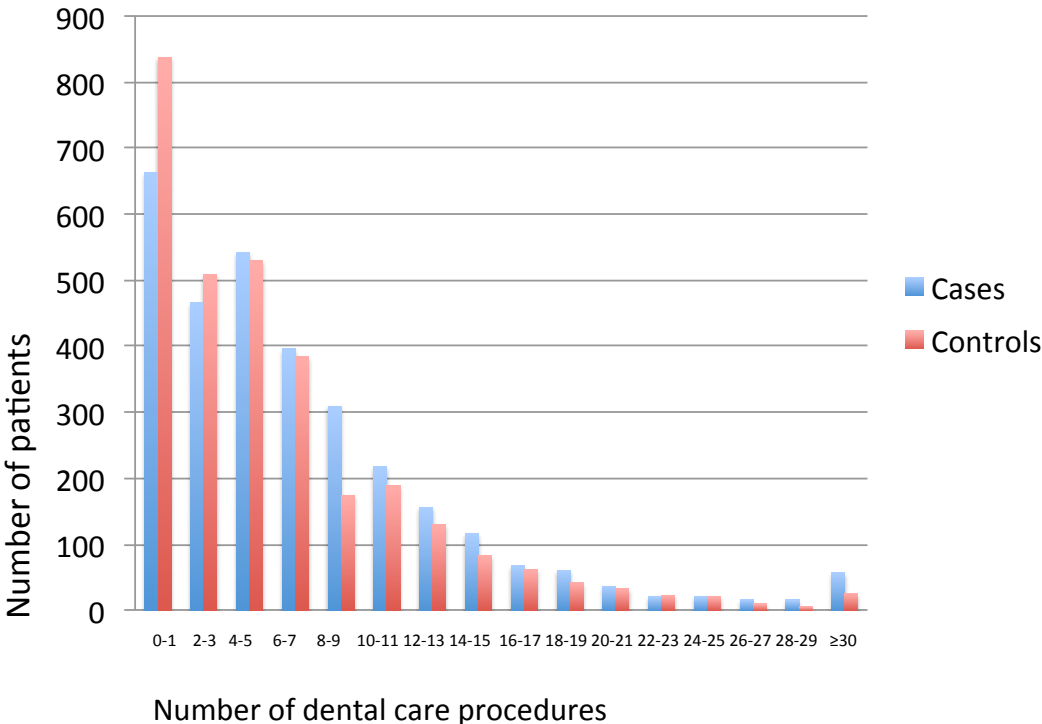

Histogram showing the total number of dental care procedures during one year (2009-2010) for 2085 patients with Crohn’s disease (1A) and 3161 patients with Ulcerative colitis (1B), and their corresponding controls.
